# Supplementary material for: The HIV-1 accessory proteins Nef and Vpu downregulate total and cell surface CD28 in CD4+ T cells
Source: PubMed Central journal article supplement (PMC5767034; doi:10.1186/s12977-018-0388-3), 2018-01-12

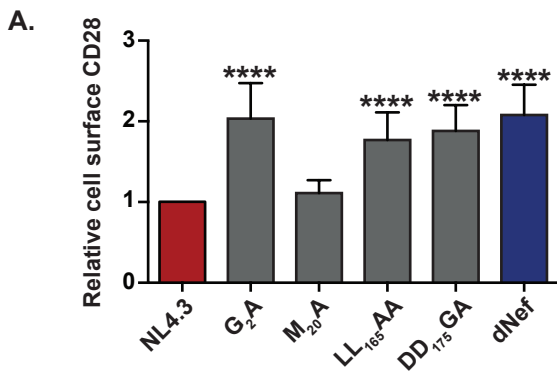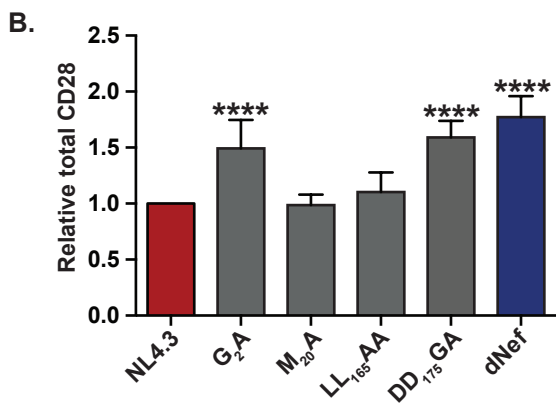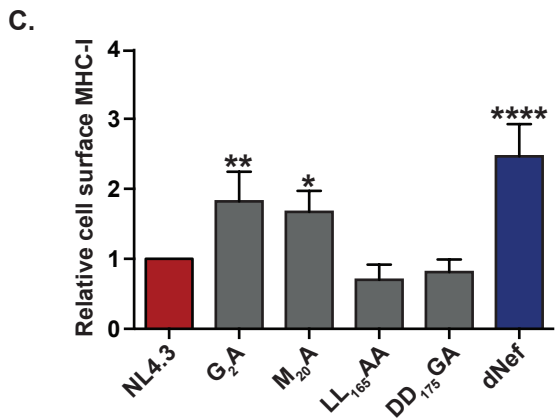

Supplement: 12977_2018_388_MOESM5_ESM.pdf [file 12977_2018_388_MOESM5_ESM.pdf]
